# Supplementary material for: Synergistic FRET assays for drug discovery targeting RyR2 channels
Source: PubMed Central journal article supplement — J Mol Cell Cardiol. Author manuscript; Available in PMC 2023 Apr 11. (PMC10088286; doi:10.1016/j.yjmcc.2022.04.002), 2022-04-09
Supplement: NIHMS1876419-supplement-Supplementary_Material.pdf [file NIHMS1876419-supplement-Supplementary_Material.pdf]

## Supplementary Information

### Synergistic FRET Assays for Drug Discovery Platform Targeting RyR2 Channels

Robyn T. Rebbeck<sup>a</sup>, Kenneth S. Ginsburg<sup>b</sup>, Christopher Y. Ko<sup>b</sup>, Anna Fasoli<sup>b</sup>, Katherine Rusch<sup>a</sup>, George F. Cai<sup>a</sup>, Xiaoqiong Dong<sup>b</sup>, David D. Thomas<sup>a</sup>, Donald M. Bers<sup>b</sup>, and Razvan L. Cornea<sup>a</sup>

<sup>a</sup>Department of Biochemistry, Molecular Biology and Biophysics, University of Minnesota, USA;

<sup>b</sup>Department of Pharmacology, University of California, Davis, USA.

Corresponding Author:

Razvan L. Cornea, Department of Biochemistry, Molecular Biology and Biophysics, University of Minnesota, 6-155 Jackson Hall, 321 Church Street SE, Minneapolis, MN 55455.

Phone: +1-612-626-2660

Email: [corne002@umn.edu](mailto:corne002@umn.edu)

## Supplementary Methods

### Myocyte indicator loading, $[Ca^{2+}]_i$ calibration and SR $Ca^{2+}$ content calculations

To help ensure consistency and limit possible  $Ca^{2+}$  buffering by the indicator when acquiring our wide-field fluorescent  $[Ca^{2+}]_i$  data, obtained as described in the main text, we loaded myocytes with Fluo8-AM only sufficiently to ensure acceptable signal-to-noise ratio and interpretability. To achieve this, we controlled loading of esterified dye according to incubation duration and temperature (room temperature), as well as the total myocyte mass (based on the mass or size of the myocyte pellet) relative to the total number of dye molecules (for which bath concentration and volume together form a surrogate). Fluorescence emission detected by photomultipliers in our photometer was integrated for 5 ms to establish each data point, the longest sampling period we consider consistent with representing  $Ca^{2+}$  transient kinetics faithfully.

Fluorescence was converted to  $[Ca^{2+}]_i$  using the pseudoratio method introduced by Cheng et al., 1993 (in their footnote 18)[1]. The pseudoratio equation is:

$$[Ca^{2+}]_i = K_d \times (F/F_0) / [(K_d/[Ca^{2+}]_{rest} + 1) - F/F_0],$$

where  $F_0$  is the cell fluorescence at rest, when  $[Ca^{2+}]_{rest}$  reaches steady state, which we assumed to be 100 nM under control conditions. We used  $K_d = 1100$  nM. While the assumption of a specific value for  $[Ca^{2+}]_{rest}$  is an unavoidable limitation with nonratiometric indicators, this value was used during all control, drug and wash periods of every experiment, facilitating our ability to represent any changes in fluorescence as actual changes in cytosolic  $[Ca]$ .

The pseudoratio equation is readily derived assuming that fluorescence reports  $Ca^{2+}$  binding to a single site on the fluorophore,  $F = F_{max} \times [Ca^{2+}] / (K_d + [Ca^{2+}])$  and simple algebraic rearrangement.  $F_{max}$  is not known in an experiment, but is an implicit function of, and can be determined from, observed rest fluorescence  $F_0$ , using only the assumption that  $F_0$  represents  $[Ca^{2+}]_{rest}$ . Minimum fluorescence  $F_{min}$  with  $[Ca^{2+}] = 0$  was taken to be negligible (0) and as noted in text, non-specific background recorded from a cell-free region of the same subtense as each cell studied was first subtracted from all raw fluorescence data before conversion.

For quantification of SR  $Ca^{2+}$  content, we converted the caffeine-induced  $Ca^{2+}$  transient amplitude ( $\Delta[Ca^{2+}]_i$ ) to the change in cytosolic total  $[Ca^{2+}]$  ( $[Ca^{2+}]_{Tot}$ ) by accounting for cytosolic  $Ca^{2+}$  buffering above 100 nM  $[Ca^{2+}]_i$  as described by Shannon *et al.*, 2000[2], and detailed in Bers, 2001[3], simplified to:

$$\Delta[Ca]_{Bound} = B_{max} / \{(1 + K_{Ca}/[Ca^{2+}]_i)\} + B_{min},$$

where  $B_{max}$  is 244  $\mu\text{mol/l}$  cytosol,  $K_{Ca}$  is 673 nM  $[Ca^{2+}]_i$ , and  $B_{min}$  is -28  $\mu\text{mol/l}$  cytosol (the theoretical value at  $[Ca^{2+}]_i = 0$ , i.e., below 100 nM)[2, 3]. This provides SR  $Ca^{2+}$  content in units normalized to cytosolic volume. Since SR volume in rabbit ventricular myocytes is ~5.2% of cytosolic volume (or 3.5% of cell volume -including mitochondria), one would multiply this inferred  $\Delta[Ca^{2+}]_{Tot}$  by 19.1 to estimate the

concentration of total intra-SR  $\text{Ca}^{2+}$  (e.g., 60  $\mu\text{mol/l}$  cytosol, typical of bars in Fig 5F), which would correspond to 1.15  $\mu\text{M}$  total intra- SR  $\text{Ca}^{2+}$ , roughly half of which would be bound by calsequestrin ( $K_{d\text{Ca}} \sim 500 \mu\text{M}$ ).

## References

- [1] H. Cheng, W.J. Lederer, M.B. Cannell, Calcium sparks: elementary events underlying excitation-contraction coupling in heart muscle, *Science* 262(5134) (1993) 740-4.  
 [2] T.R. Shannon, K.S. Ginsburg, D.M. Bers, Reverse mode of the sarcoplasmic reticulum calcium pump and load-dependent cytosolic calcium decline in voltage-clamped cardiac ventricular myocytes, *Biophys J* 78(1) (2000) 322-33.  
 [3] D.M. Bers, *Excitation-Contraction Coupling and Cardiac Contractile Force.*, 2nd ed., Kluwer Academic Press, Dordrecht, Netherlands, 2001.

## Supplementary Tables

**Supplementary Table 1** Number (#) of Hits and Hit reproducibility for 3SD and 5SD threshold.

| A-CaM FRET |                                             | No $\text{H}_2\text{O}_2$ |         |         | $\text{H}_2\text{O}_2$ treatment |         |         |
|------------|---------------------------------------------|---------------------------|---------|---------|----------------------------------|---------|---------|
|            |                                             | Plate 1                   | Plate 2 | Plate 3 | Plate 1                          | Plate 2 | Plate 3 |
| 3SD        | # of Hits 20 min                            | 122                       | 30      | 56      | 147                              | 69      | 59      |
|            | # of Hits 120 min                           | 114                       | 74      | 82      | 179                              | 29      | 84      |
|            | % of Repeated Hits in 2 plates <sup>1</sup> | 43.0                      | 62.2    | 59.8    | 26.8                             | 82.8    | 56.0    |
|            | % of Repeated Hits in 3 plates <sup>1</sup> | 33.3                      | 51.4    | 46.3    | 12.8                             | 79.3    | 27.4    |
| 5SD        | # of Hits 20 min                            | 52                        | 18      | 37      | 49                               | 34      | 36      |
|            | # of Hits 120 min                           | 52                        | 41      | 45      | 72                               | 22      | 49      |
|            | % of Repeated Hits in 2 plates <sup>1</sup> | 63.5                      | 75.6    | 71.1    | 44.4                             | 77.3    | 65.3    |
|            | % of Repeated Hits in 3 plates <sup>1</sup> | 53.8                      | 68.3    | 62.2    | 23.6                             | 77.3    | 35.0    |

| A-DPc10 FRET |                                             | No $\text{H}_2\text{O}_2$ |         |         | $\text{H}_2\text{O}_2$ treatment |         |         |
|--------------|---------------------------------------------|---------------------------|---------|---------|----------------------------------|---------|---------|
|              |                                             | Plate 1                   | Plate 2 | Plate 3 | Plate 1                          | Plate 2 | Plate 3 |
| 3SD          | # of Hits 20 min                            | 62                        | 81      | 39      | 62                               | 16      | 48      |
|              | # of Hits 120 min                           | 64                        | 114     | 40      | 65                               | 43      | 62      |
|              | % of Repeated Hits in 2 plates <sup>1</sup> | 35.9                      | 31.6    | 75      | 43.1                             | 65.1    | 45.2    |
|              | % of Repeated Hits in 3 plates <sup>1</sup> | 26.6                      | 14.9    | 42.5    | 36.9                             | 55.8    | 38.7    |
| 5SD          | # of Hits 20 min                            | 26                        | 38      | 18      | 26                               | 18      | 25      |
|              | # of Hits 120 min                           | 16                        | 41      | 18      | 15                               | 20      | 25      |
|              | % of Repeated Hits in 2 plates <sup>1</sup> | 56.3                      | 39.0    | 77.8    | 93.3                             | 70.0    | 52.0    |
|              | % of Repeated Hits in 3 plates <sup>1</sup> | 43.8                      | 17.1    | 38.9    | 73.3                             | 55.0    | 44.0    |

<sup>1</sup> Data for 120 min incubation.

## Supplementary Figures

### A - A-CaM FLT waveforms

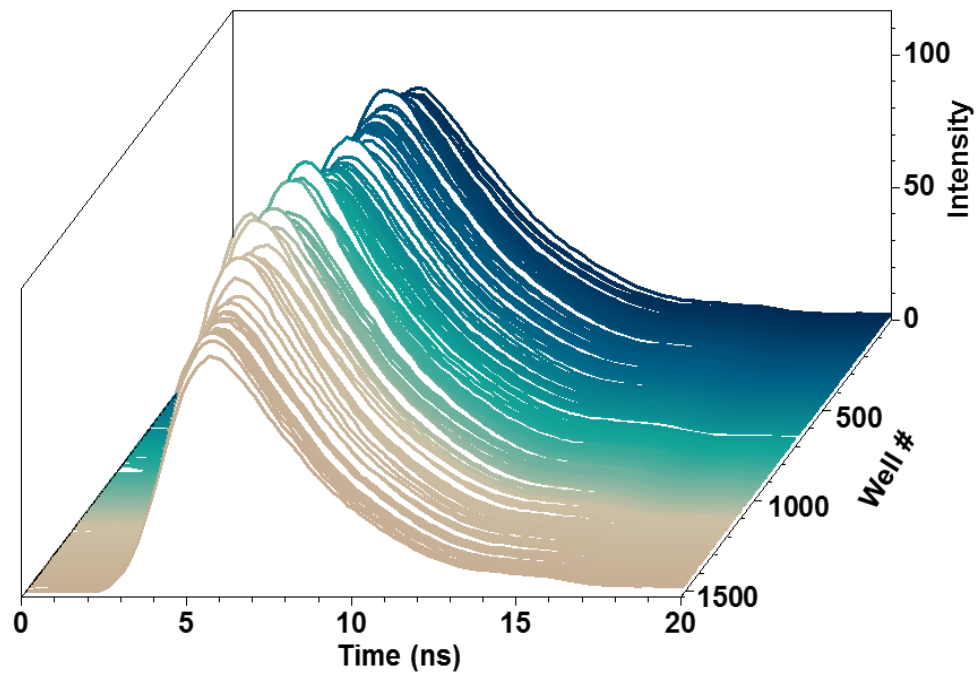

### B - A-DPc10 FLT waveforms

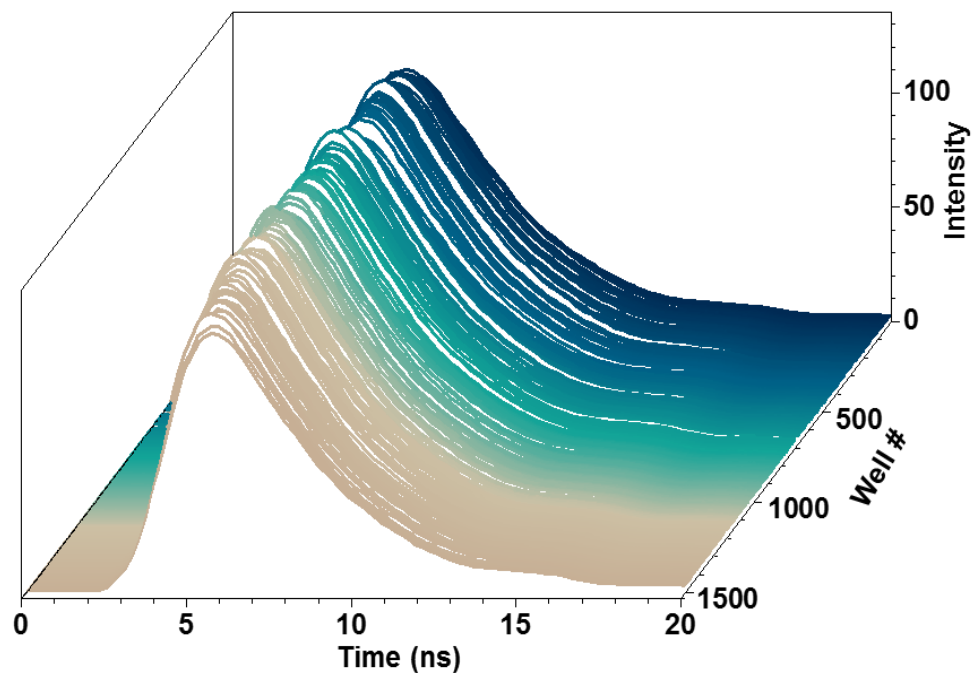

**Supplementary Fig. 1 Fluorescence lifetime measurements of FRET.** Fluorescence waveforms acquired from 1536-well plates loaded with the 1280 compounds of LOPAC and samples corresponding to the A) A-CaM or B) A-DPc10 FRET assays. These measurements were performed using a high-throughput fluorescence lifetime plate-reader (Fluorescence Innovations, Inc. MN, USA) provided by Photonic Pharma LLC (MN, USA), as described in Materials and Methods.

## A - sector NW

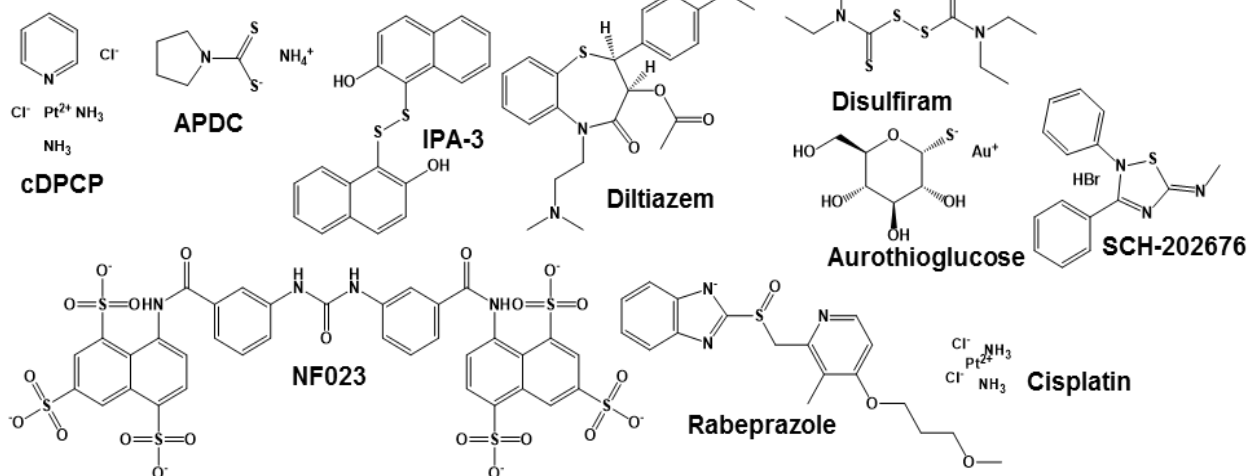

## B - sector NE

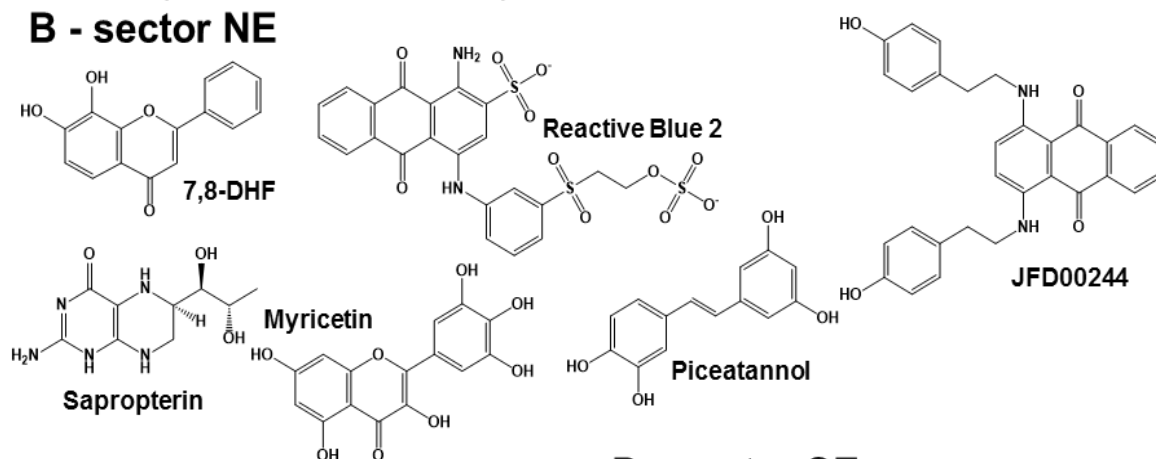

## C - sector SW

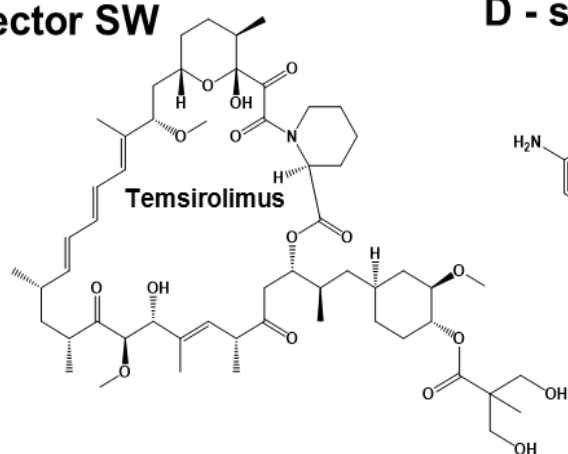

## D - sector SE

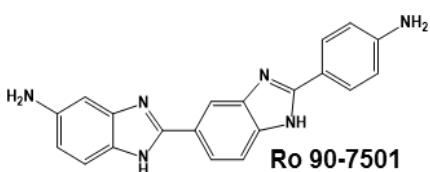

**Supplementary Fig. 2 Chemical structures of Hit compounds that reproducibly altered both A-CaM and A-DPc10 FRET in LOPAC screens.** Sector assignment (Fig. 3) attributed to effect on A-CaM and A-DPc10 FRET. A) Sector NW indicates that these compounds decreased A-CaM FRET and increased A-DPc10 FRET. B) Sector NE indicates that these compounds increased both A-CaM and A-DPc10 FRET. C) Sector SW indicates that this compound decreased both A-CaM and A-DPc10. D) Sector SE indicates that this compound increased A-CaM and decreased A-DPc10.

### A - sector W

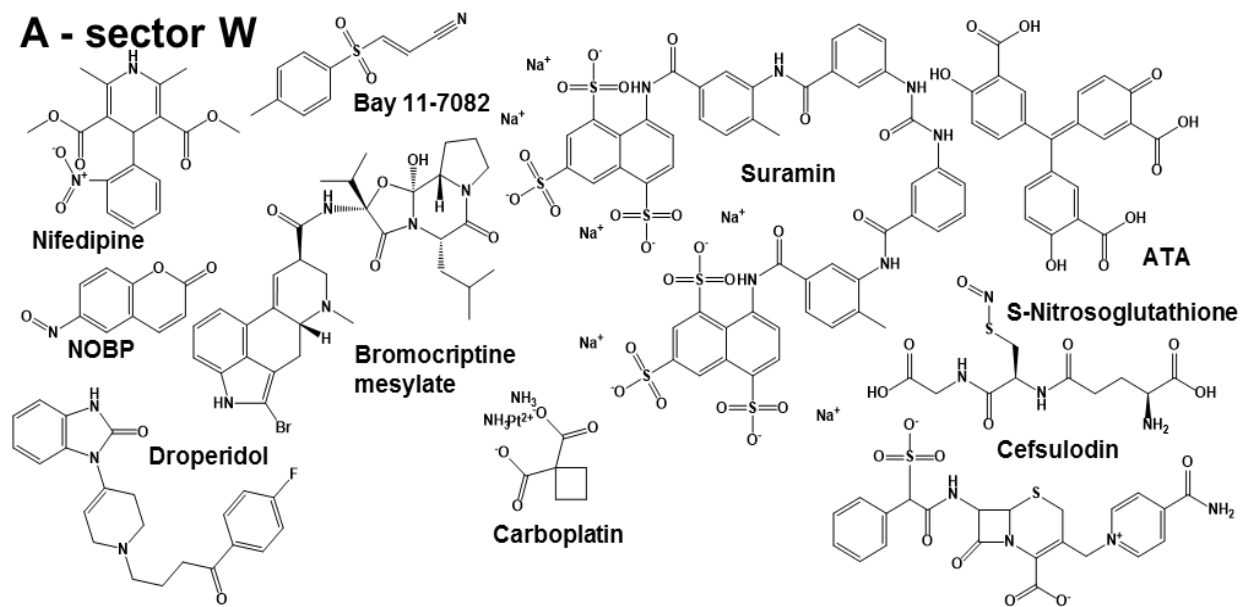

### B - sector E

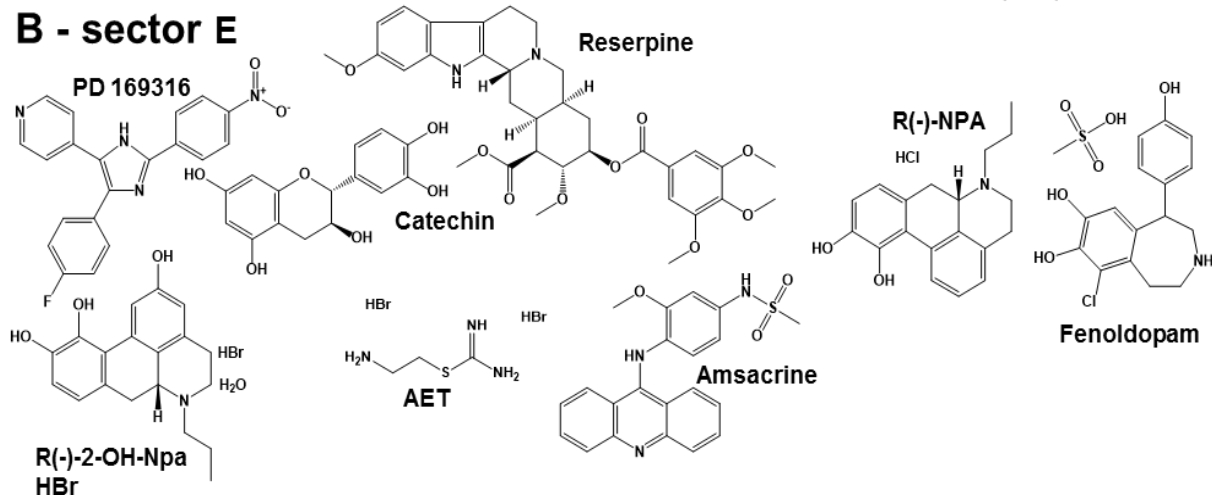

### C - sector N

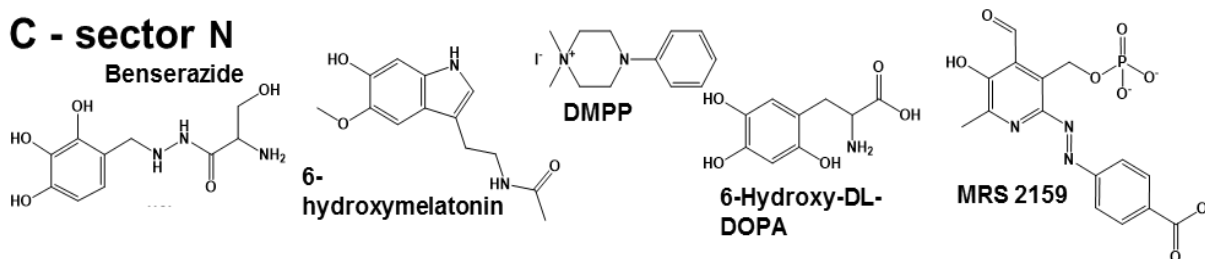

**Supplementary Fig. 3 Chemical structures of compounds that reproducibly altered only A-CaM or A-DPc10 FRET in LOPAC screens.** Sector assignment (Fig. 3) attributed to effect on A-CaM and A-DPc10 FRET. A) Sector W indicates that these compounds increased A-CaM FRET. B) Sector E indicates that these compounds decreased A-CaM FRET. C) Sector N indicates that these compounds increased A-DPc10 FRET.

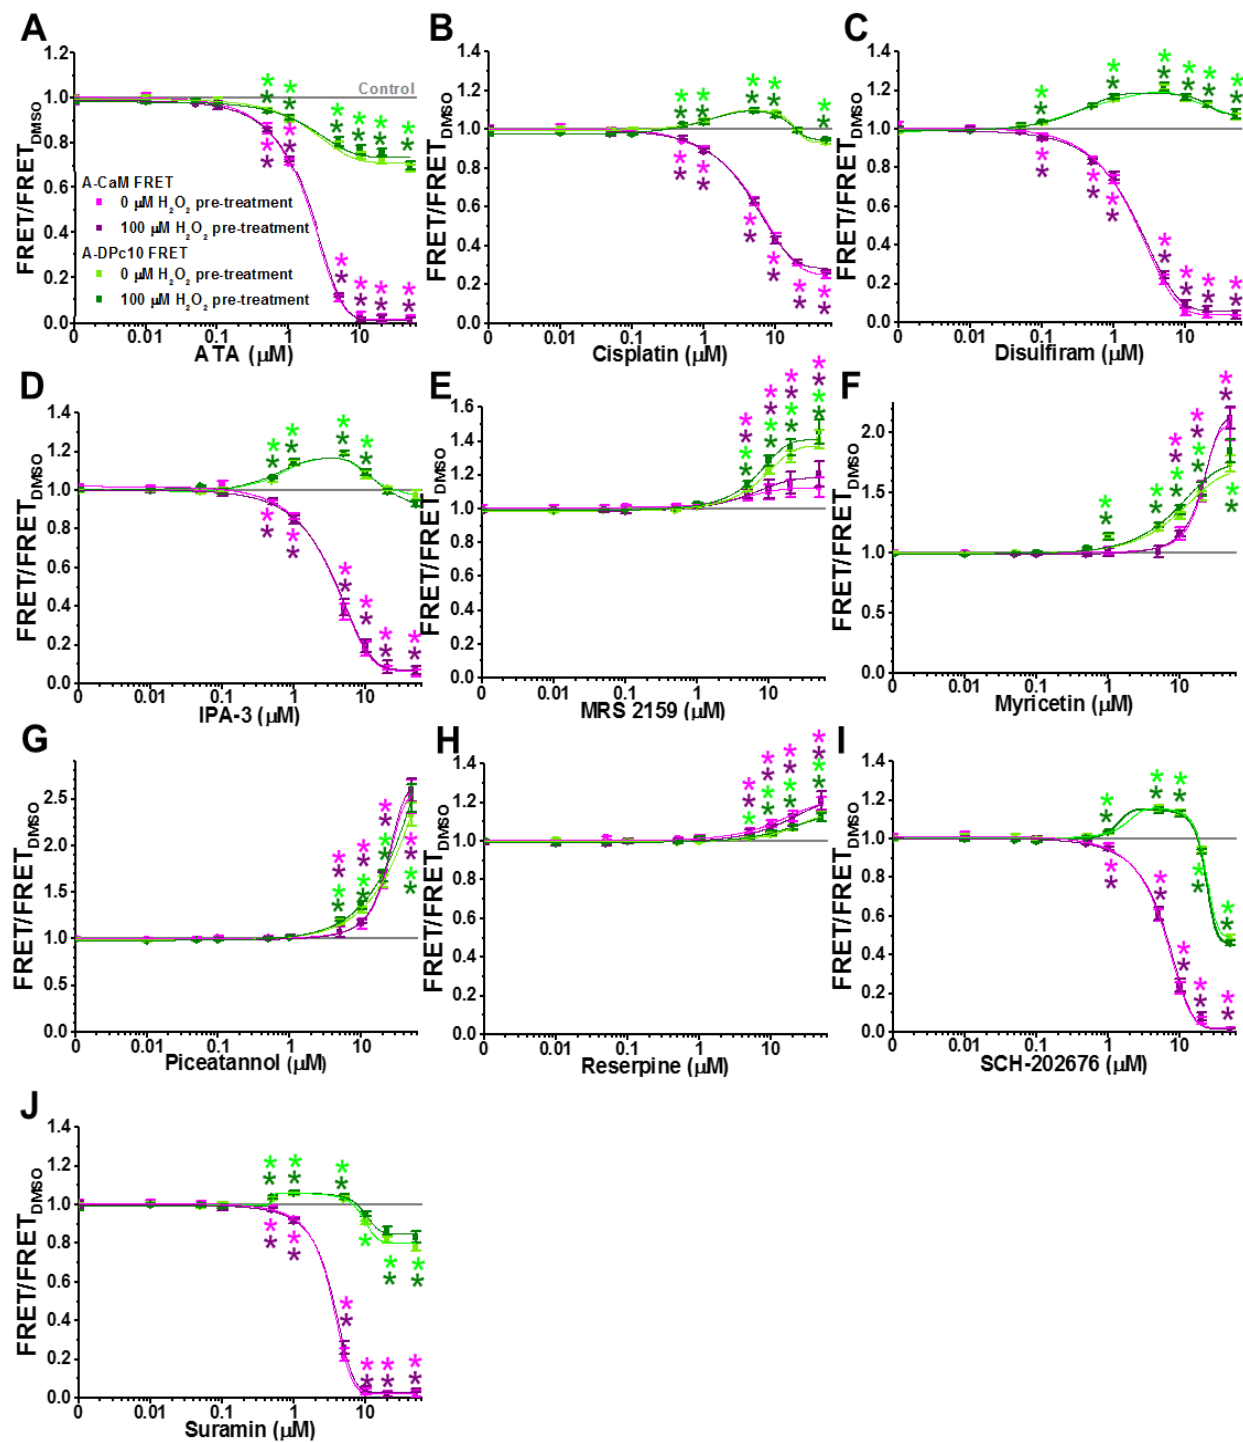

**Supplementary Fig. 4 A-CaM or A-DPc10 FLT-FRET profiles for RyR2 over a range of Hit concentrations.** Normalized FLT-FRET dose response to A) ATA, B) cisplatin, C) disulfiram, D) IPA-3, E) MRS 2159, F) myricetin, G) piceatannol, H) reserpine, I) SCH0202676, and J) suramin, using cardiac D-FKBP-decorated RyR2 (in CSR) and A-CaM (purple) or A-DPc10 (green), at 30 nM Ca<sup>2+</sup> following pre-treatment with no H<sub>2</sub>O<sub>2</sub> (light color), or 100 μM H<sub>2</sub>O<sub>2</sub> (dark color). Data are normalized relative to the values for no-drug DMSO control (grey line). A-CaM FRET<sub>control</sub> values of SR exposed to no H<sub>2</sub>O<sub>2</sub> and plus H<sub>2</sub>O<sub>2</sub> treatment were 0.11±0.02 and 0.1±0.02, respectively. A-DPc10 FRET<sub>control</sub> values of SR exposed to no H<sub>2</sub>O<sub>2</sub> and plus H<sub>2</sub>O<sub>2</sub> treatment were 0.13±0.03 and 0.13±0.03, respectively. Means ± SEM, n=3. \*P < 0.05 vs. DMSO by 2-sided Student's unpaired T-test.

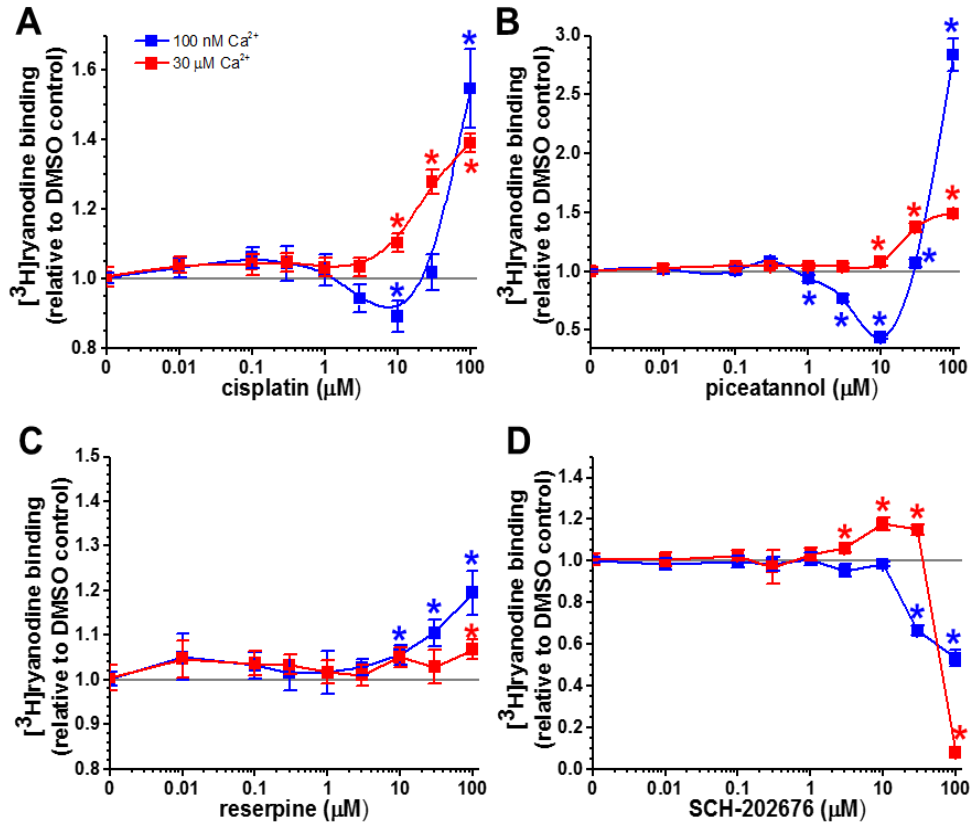

**Supplementary Fig. 5** [ $^3\text{H}$ ]ryanodine binding to RyR2 over a range of Hit concentrations. A) cisplatin, B) piceatannol, C) reserpine, and D) SCH-202676, at 100 nM (blue) or 30  $\mu\text{M}$  (red) free  $\text{Ca}^{2+}$ . Data are normalized relative to the values for no-drug DMSO control (grey line). Data are shown as means  $\pm$  SEM,  $n=3$ . \* $P < 0.05$  vs. DMSO by 2-sided Student's unpaired T-test.

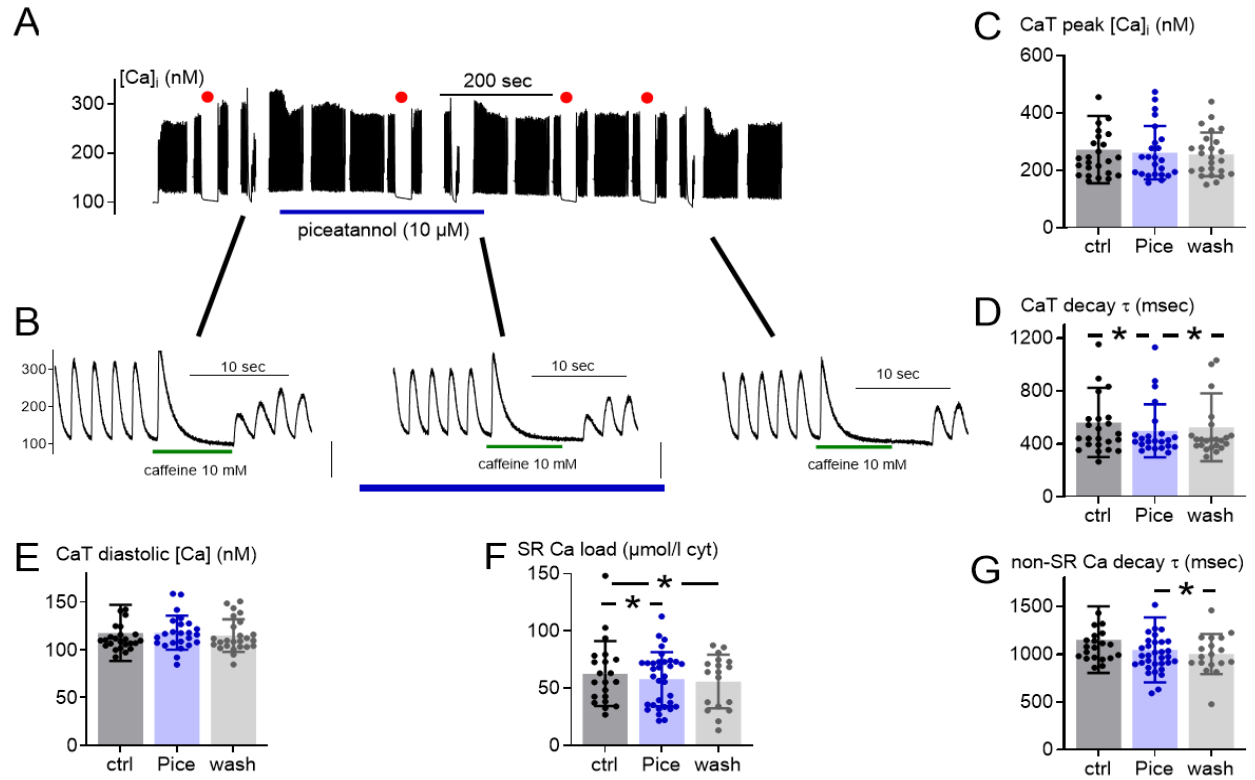

**Supplementary Fig. 6 Piceatannol did not affect  $\text{Ca}^{2+}$  handling in normal rabbit myocytes.** A) Time series of a representative experiment with piceatannol (blue underbar), decimated from  $>1 \times 10^6$  data points to a more practical  $1 \times 10^4$  points. Red dots (30s rests) indicate that the resting fluorescence was stable and justifies free  $[\text{Ca}^{2+}]_i$  pseudo-ratio measurements with resting  $[\text{Ca}^{2+}]_i$  at baseline assumed to be 100 nM. B) Detail of same experiment before, during and after drug contact, each showing final 10 sec of steady state  $\text{Ca}^{2+}$  transients, followed by 10 mM caffeine (duration 8 s, green underbars) to assay SR  $\text{Ca}^{2+}$  loading. C) Peak transient  $[\text{Ca}^{2+}]_i$ , D) transient  $[\text{Ca}^{2+}]_i$  decay time constant and (E) residual (diastolic)  $[\text{Ca}^{2+}]_i$  at the end of each transient, predicted by exponential fitting. (C-E) #cells/#animal (n/N) = 24/8, 23/8 and 24/8 for control, piceatannol and wash, respectively. F) SR  $\text{Ca}^{2+}$  loading, represented as total  $[\text{Ca}^{2+}]$  released to cytosol by caffeine (calculated as in text). G)  $\text{Ca}^{2+}$  transient decay time constant measured with caffeine present, representing non-SR  $\text{Ca}^{2+}$  removal, mainly via Na/Ca exchange. (F and G) n/N = 21/8, 33/8 and 18/8 for control, piceatannol and wash, respectively.  $[\text{Ca}^{2+}]$  in (C), (E) and (F) shown with one dot per cell, measured via pseudo-ratio relative to the same cell's rest value (red dots in A). \* $P < 0.05$  vs. control (ctrl) by 2-sided Student's paired T-test.
